# Supplementary material
Source: publisher site journal article supplement (https://www.dovepress.com/get_supplementary_file.php?f=226254.docx)
Supplement: Supplementary file 1 [file get_supplementary_file.php]

Supporting Information


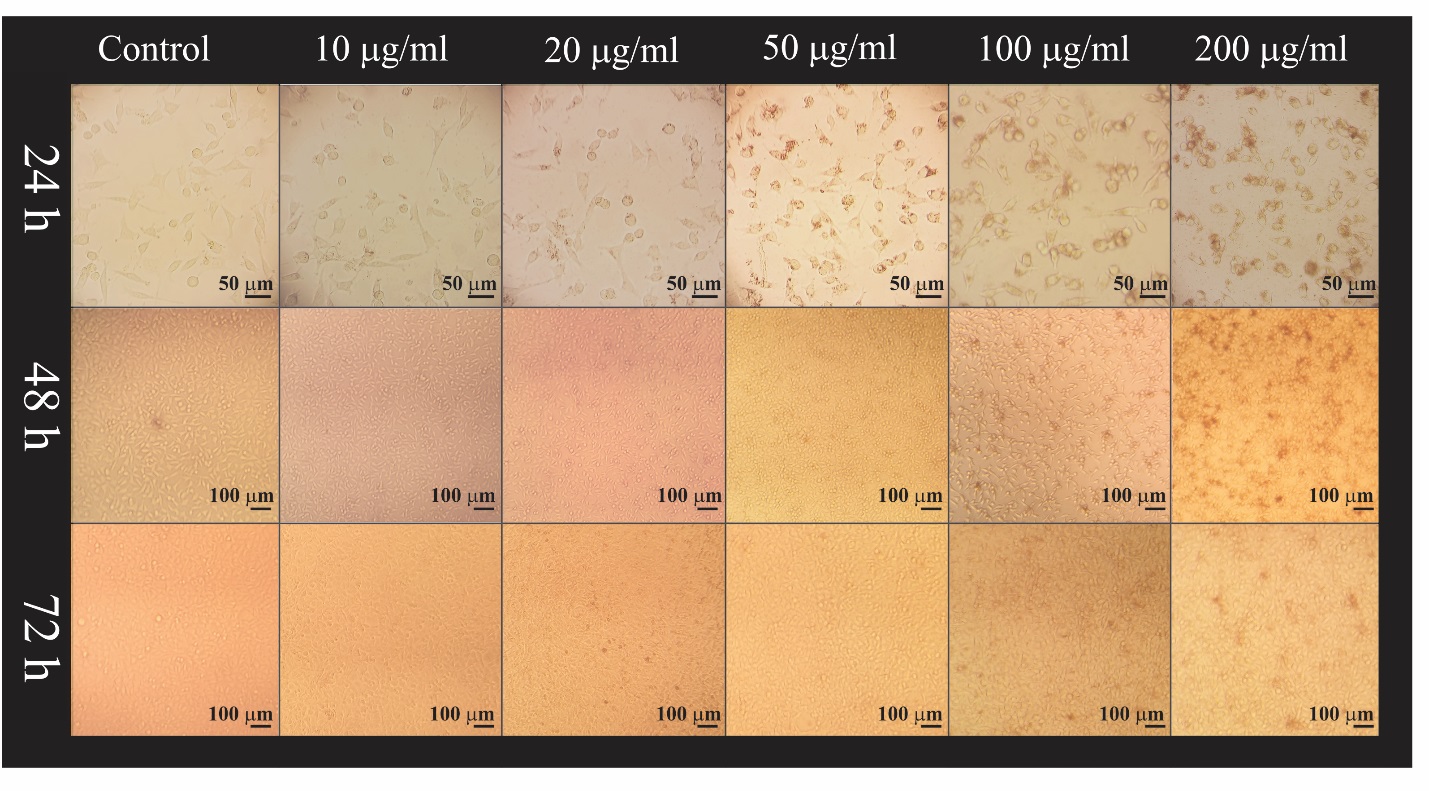


**Figure S1 : Light microscopy images of the cells exposed to different concentrations of PS-IONs for 24,48 and 72 hours.**


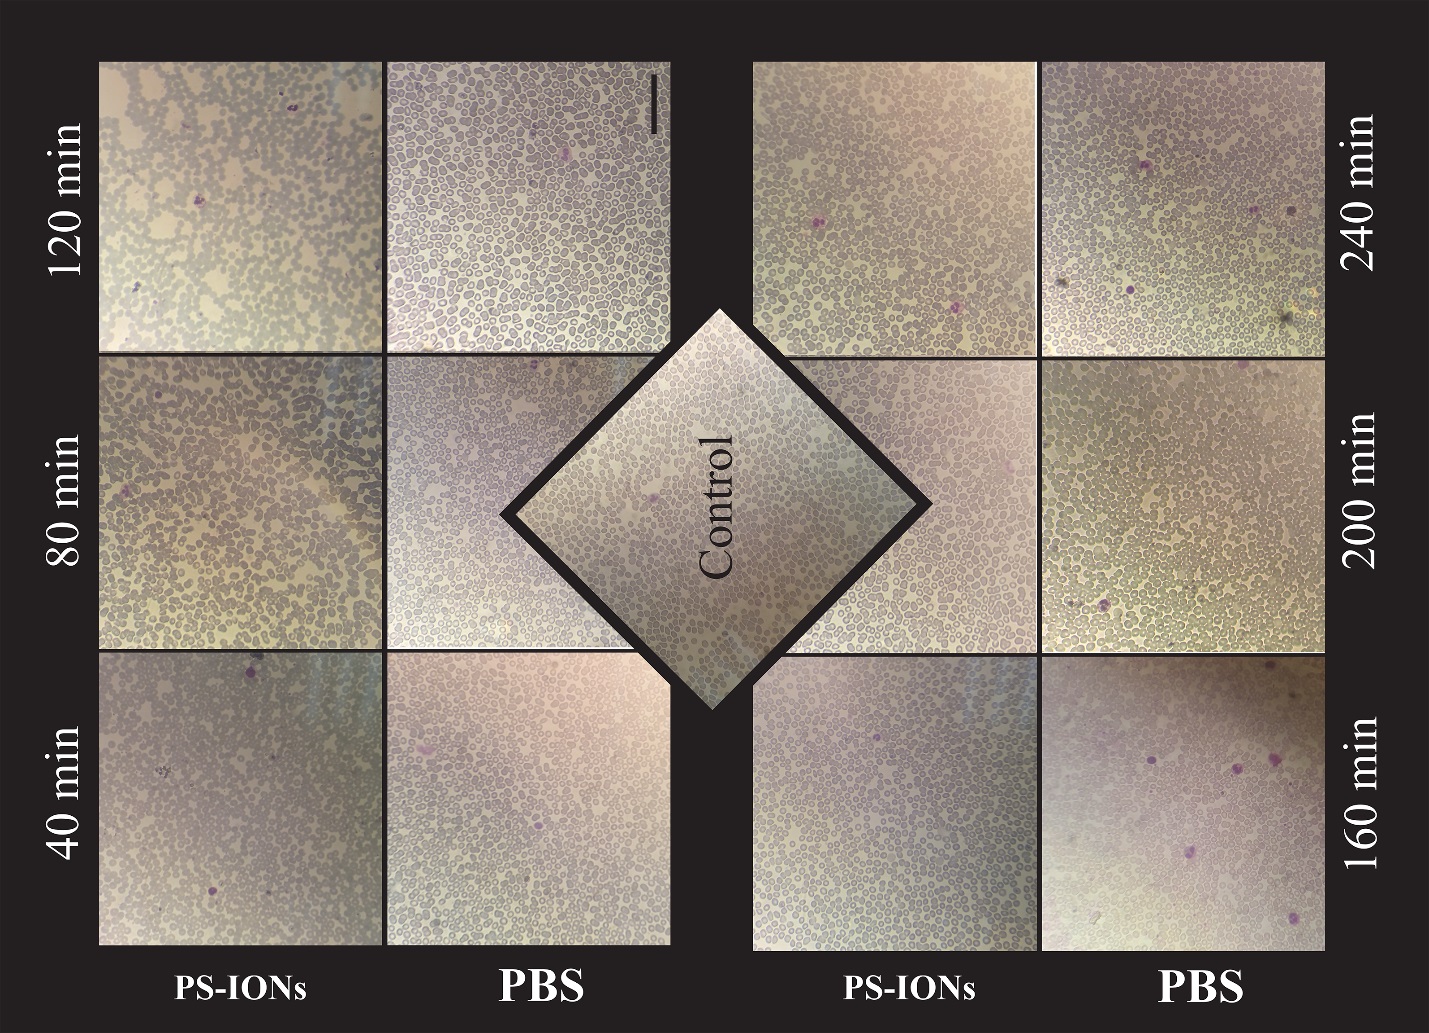


**Figure S2 : Light microscopic images of blood smears prepared samples from EDTA-anticoagulated blood without dilution (control) and after addition of PS-IONs (final concentration 200 μg /mL) and PBS in 40 min time intervals up to 4 h. Scale bar, 50 µm .**


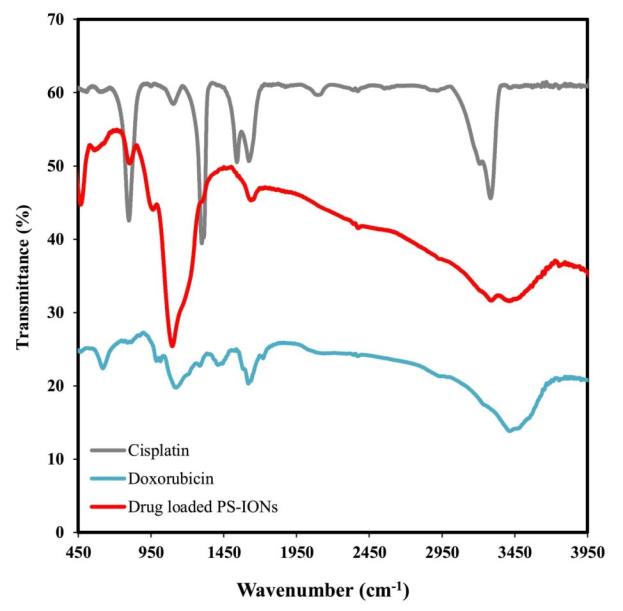


**Figure S3 : FT-IR spectra of CDDP (grey line), DOX (blue ine) and drug loaded PS-IONs (red line).**


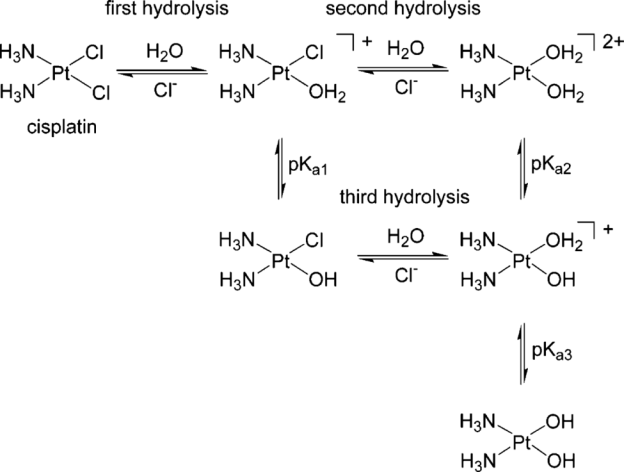


**Figure S4: CDDP hydrolysis[44]**


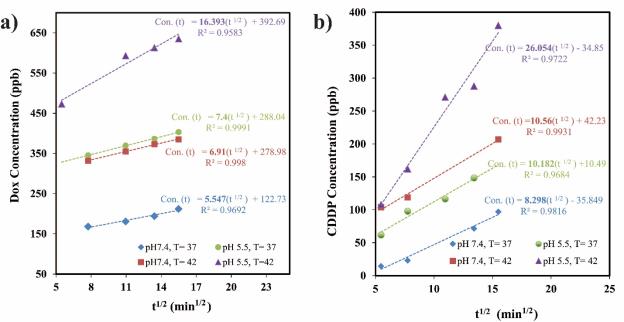


**Figure S5: Release profiles of DOX (a) and CDDP (b) from PS-IONs as a function of square root of time.**

**According to the Higuchi equation, the release rate constant in each condition can be calculated from the slop of fitted lines [43].**
